# Supplementary material for: Engineering Synthetic Microbial Communities through a Selective Biofilm Cultivation Device for the Production of Fermented Beverages
Source: MDPI journal article supplement (doi:10.3390/microorganisms7070206), 2019-07-20
Supplement: s1 [file s1]

## Supplementary Materials:

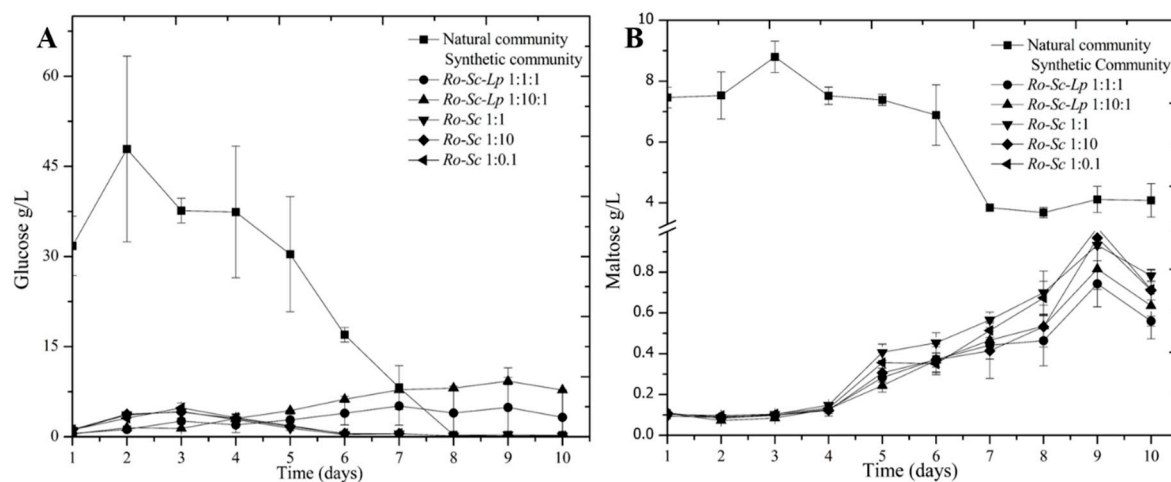

**Figure S1.** Kinetics of glucose (A) and maltose (B) production during fermentation by natural and synthetic communities. Synthetic communities have been prepared with different ratio between microbial species. In all cases *R. oryzae* (*Ro*) has been inoculated at an initial concentration of  $10^6$  spores/mL. For the cultures involving either *S. cerevisiae* (*Sc*) or *L. plantarum* (*Lp*), their initial concentration is indicated by 0.1, 1 or 10 corresponding to  $10^5$ ,  $10^6$  and  $10^7$  cells/mL respectively
